# Supplementary material for: TENAYA and LUCERNE: Rationale and Design for the Phase 3 Clinical Trials of Faricimab for Neovascular Age-Related Macular Degeneration
Source: PubMed Central journal article supplement (PMC9559073; doi:10.1016/j.xops.2021.100076), 2021-11-17
Supplement: mmc2.pdf [file mmc2.pdf]

**Supplementary Information**

eTable S1. Full List of institutional review boards (IRB)/ethics committees (EC) for TENAYA and LUCERNE trials

| <b>Investigator</b>   | <b>IRB/EC Name and Address</b>                                                                                        | <b>Country</b> |
|-----------------------|-----------------------------------------------------------------------------------------------------------------------|----------------|
| Karabas, Levent       | Baskent University Clinical Research Ethics Committee                                                                 | Turkey         |
| Yilmaz, Gursel        | Baskent University Clinical Research Ethics Committee                                                                 | Turkey         |
| Ozturk, Banu          | Baskent University Clinical Research Ethics Committee                                                                 | Turkey         |
| Seres, András         | Egeszsegugyi Tudomanyos Tanacs                                                                                        | Hungary        |
| Herba, Ewa            | Komisja Bioetyczna przy Slaskiej Izbie Lekarskiej w Katowicach                                                        | Poland         |
| Muzyka-Wozniak, Maria | Komisja Bioetyczna przy Slaskiej Izbie Lekarskiej w Katowicach                                                        | Poland         |
| Nowinska, Anna        | Komisja Bioetyczna przy Slaskiej Izbie Lekarskiej w Katowicach                                                        | Poland         |
| Wowra, Bogumil        | Komisja Bioetyczna przy Slaskiej Izbie Lekarskiej w Katowicach                                                        | Poland         |
| Varsanyi, Balazs      | Egeszsegugyi Tudomanyos Tanacs                                                                                        | Hungary        |
| Aradi, Etelka         | Egeszsegugyi Tudomanyos Tanacs                                                                                        | Hungary        |
| Oleksy, Piotr         | Komisja Bioetyczna przy Slaskiej Izbie Lekarskiej w Katowicach                                                        | Poland         |
| Becker, Matthias      | Kantonale Ethikkommission Zürich (KEK), Kantonale Ethikkommission, Stampfenbachstrasse 121, 8090, Zürich, SWITZERLAND | Switzerland    |
| Goldstein, Michaela   | Helsinki Committee – Sourasky Tel Aviv; EC/IRB, 6 WEITZMAN STREET, 6423906, TEL AVIV, ISRAEL                          | Israel         |
| Morori-Katz, Haia     | Helsinki Committee - Kaplan                                                                                           | Israel         |
| Patel, Praveen        | Trent Multi-centre Research Ethics Committee                                                                          | United Kingdom |
| Gale, Richard         | Trent Multi-centre Research Ethics Committee                                                                          | United Kingdom |
| Ghanchi, Faruque      | Trent Multi-centre Research Ethics Committee                                                                          | United Kingdom |
| Lotery, Andrew        | Trent Multi-centre Research Ethics Committee                                                                          | United Kingdom |
| Saedon, Habiba        | Trent Multi-centre Research Ethics Committee                                                                          | United Kingdom |
| Menon, Geeta          | Trent Multi-centre Research Ethics Committee                                                                          | United Kingdom |
| Mohamed, Quresh       | Trent Multi-centre Research Ethics Committee                                                                          | United Kingdom |
| Saeed, Usman          | Trent Multi-centre Research Ethics Committee                                                                          | United Kingdom |
| Cole, Abosede         | Trent Multi-centre Research Ethics Committee                                                                          | United Kingdom |
| Talks, James          | Trent Multi-centre Research Ethics Committee                                                                          | United Kingdom |
| Asaria, Riaz          | Trent Multi-centre Research Ethics Committee                                                                          | United Kingdom |
| Downey, Louise        | Trent Multi-centre Research Ethics Committee                                                                          | United Kingdom |
| Levy, Jaime           | Helsinki Committee –Hadassah; EC/IRB                                                                                  | Israel         |
| Agostini, Hansjürgen  | Ethik-Kommission der Albert-Ludwigs-Universität, Engelberger Straße 21, 79106, Freiburg, GERMANY                      | Germany        |
| Khoramnia, Ramin      | EK Heidelberg, Alte Glockengießerei 11/1, 69115, Heidelberg, GERMANY                                                  | Germany        |

|                          |                                                                                                                                                                                |                          |
|--------------------------|--------------------------------------------------------------------------------------------------------------------------------------------------------------------------------|--------------------------|
| Völker, Michael          | Ethik-Kommission der Medizinischen Fakultät und am, Gartenstraße 47, 72074, Tübingen, GERMANY                                                                                  | Germany                  |
| Ramirez Estudillo, Juan  | CEI de Clínica Bajío CLINBA; Comité de Etica en Investigacion, Valenciana 7, Col. Paxtitlán. Guanajuato, Gto., 36090, Guanajuato, MEXICO                                       | Mexico                   |
| Lozano Rechy, David      | CEI de Clínica Bajío CLINBA; Comité de Etica en Investigacion, Calle Doctor Tomás Zavala No. 47, Col. Burócrata, Guanajuato, Gto., CP 36256, 36256, MARFIL, GUANAJUATO, MEXICO | Mexico                   |
| Montemayor Lobo, Rodrigo | CEI de Clínica Bajío CLINBA; Comité de Etica en Investigacion, Valenciana 7, Col. Paxtitlán. Guanajuato, Gto., 36090, Guanajuato, MEXICO                                       | Mexico                   |
| Hatz, Katja              | Ethikkommission Nordwest- und Zentralschweiz (EKNZ), Hebelstrasse 53, 4056, Basel, SWITZERLAND                                                                                 | Switzerland              |
| Burgess, Stuart          | Advarra, 6940 Columbia Gateway Drive, COLUMBIA, MD, 21046, UNITED STATES                                                                                                       | United States of America |
| Huddleston, Stephen      | Advarra, 6940 Columbia Gateway Drive, COLUMBIA, MD, 21046, UNITED STATES                                                                                                       | United States of America |
| Campochiaro, Peter       | Johns Hopkins Medicine Institutional Review Board, 1620 McElderry Street, Reed Hall B-130, Baltimore, MD, 21205-1911, UNITED STATES                                            | United States of America |
| Carlson, John            | Advarra, 6940 Columbia Gateway Drive, COLUMBIA, MD, 21046, UNITED STATES                                                                                                       | United States of America |
| Chan, Clement            | Advarra, 6940 Columbia Gateway Drive, COLUMBIA, MD, 21046, UNITED STATES                                                                                                       | United States of America |
| Chang, Emmanuel          | Advarra, 6940 Columbia Gateway Drive, COLUMBIA, MD, 21046, UNITED STATES                                                                                                       | United States of America |
| Brown, Jamin             | Advarra, 6940 Columbia Gateway Drive, COLUMBIA, MD, 21046, UNITED STATES                                                                                                       | United States of America |
| Hershberger, Vrinda      | Advarra, 6940 Columbia Gateway Drive, COLUMBIA, MD, 21046, UNITED STATES                                                                                                       | United States of America |
| Higgins, Patrick         | Advarra, 6940 Columbia Gateway Drive, COLUMBIA, MD, 21046, UNITED STATES                                                                                                       | United States of America |
| Holekamp, Nancy          | Advarra, 6940 Columbia Gateway Drive, COLUMBIA, MD, 21046, UNITED STATES                                                                                                       | United States of America |
| Spencer, Doran           | UCSD Human Research Protections Program; Altman Clinical and Translational Institute, 9452 Medical Center Drive, Level 2, LA JOLLA, CA, 92093, UNITED STATES                   | United States of America |
| Chaudhry, Nauman         | Advarra, 6940 Columbia Gateway Drive, COLUMBIA, MD, 21046, UNITED STATES                                                                                                       | United States of America |
| Cheek, Andrew            | Advarra, 6940 Columbia Gateway Drive, COLUMBIA, MD, 21046, UNITED STATES                                                                                                       | United States of America |
| Rich, Ryan               | Advarra, 6940 Columbia Gateway Drive, COLUMBIA, MD, 21046, UNITED STATES                                                                                                       | United States of America |
| Connolly, Brian          | Advarra, 6940 Columbia Gateway Drive, COLUMBIA, MD, 21046, UNITED STATES                                                                                                       | United States of America |
| Abbey, Ashkan            | Advarra, 6940 Columbia Gateway Drive, COLUMBIA, MD, 21046, UNITED STATES                                                                                                       | United States of America |
| Wong, David              | St Mike's Hospital Research Ethics Board, 30 BOND STREET, M5B 1W8, TORONTO, Ontario, CANADA                                                                                    | Canada                   |
| Williams, Geoff          | Health Research Ethics Board of Alberta, 1500, 10104-103 Ave NW, T5J 4A7, EDMONTON, Alberta, CANADA                                                                            | Canada                   |
| Graff, Jordan            | Advarra, 6940 Columbia Gateway Drive, COLUMBIA, MD, 21046, UNITED STATES                                                                                                       | United States of America |

|                   |                                                                                                                                                          |                          |
|-------------------|----------------------------------------------------------------------------------------------------------------------------------------------------------|--------------------------|
| Alfaro, Virgil    | Advarra, 6940 Columbia Gateway Drive, COLUMBIA, MD, 21046, UNITED STATES                                                                                 | United States of America |
| Sheidow, Thomas   | Western University Health Science Research Ethics Board                                                                                                  | Canada                   |
| Danzig, Carl      | Advarra, 6940 Columbia Gateway Drive, COLUMBIA, MD, 21046, UNITED STATES                                                                                 | United States of America |
| Dessouki, Amr     | Advarra, 6940 Columbia Gateway Drive, COLUMBIA, MD, 21046, UNITED STATES                                                                                 | United States of America |
| Itty, Sujit       | Advarra, 6940 Columbia Gateway Drive, COLUMBIA, MD, 21046, UNITED STATES                                                                                 | United States of America |
| Eichenbaum, David | Advarra, 6940 Columbia Gateway Drive, COLUMBIA, MD, 21046, UNITED STATES                                                                                 | United States of America |
| Engstrom, Robert  | Advarra, 6940 Columbia Gateway Drive, COLUMBIA, MD, 21046, UNITED STATES                                                                                 | United States of America |
| Faber, David W.   | Advarra, 6940 Columbia Gateway Drive, COLUMBIA, MD, 21046, UNITED STATES                                                                                 | United States of America |
| Falk, Naomi       | Advarra, 6940 Columbia Gateway Drive, COLUMBIA, MD, 21046, UNITED STATES                                                                                 | United States of America |
| Dollin, Michael   | Ottawa Ethics Board; Ottawa Health Science Network Research Ethics Board (OHSNREB), 725 Parkdale Avenue, Civic Box 675, K1Y 4E9, Ottawa, Ontario, CANADA | Canada                   |
| Feiner, Leonard   | Advarra, 6940 Columbia Gateway Drive, COLUMBIA, MD, 21046, UNITED STATES                                                                                 | United States of America |
| Ferrone, Philip   | Advarra, 6940 Columbia Gateway Drive, COLUMBIA, MD, 21046, UNITED STATES                                                                                 | United States of America |
| Shah, Sumit       | Advarra, 6940 Columbia Gateway Drive, COLUMBIA, MD, 21046, UNITED STATES                                                                                 | United States of America |
| Fox, Gregory M.   | Advarra, 6940 Columbia Gateway Drive, COLUMBIA, MD, 21046, UNITED STATES                                                                                 | United States of America |
| Chow, David       | Advarra Inc., 300-372 Hollandview Trail, L4G 0A5, AURORA, Ontario, CANADA                                                                                | Canada                   |
| Gasperini, Julie  | Advarra, 6940 Columbia Gateway Drive, COLUMBIA, MD, 21046, UNITED STATES                                                                                 | United States of America |
| Gill, Manjot      | Advarra, 6940 Columbia Gateway Drive, COLUMBIA, MD, 21046, UNITED STATES                                                                                 | United States of America |
| Glaser, David     | Advarra, 6940 Columbia Gateway Drive, COLUMBIA, MD, 21046, UNITED STATES                                                                                 | United States of America |
| Gonzalez, Victor  | Advarra, 6940 Columbia Gateway Drive, COLUMBIA, MD, 21046, UNITED STATES                                                                                 | United States of America |
| Gupta, Sunil      | Advarra, 6940 Columbia Gateway Drive, COLUMBIA, MD, 21046, UNITED STATES                                                                                 | United States of America |
| Javid, Cameron    | Advarra, 6940 Columbia Gateway Drive, COLUMBIA, MD, 21046, UNITED STATES                                                                                 | United States of America |
| Kelty, Patrick    | Advarra, 6940 Columbia Gateway Drive, COLUMBIA, MD, 21046, UNITED STATES                                                                                 | United States of America |
| Almony, Arghavan  | Advarra, 6940 Columbia Gateway Drive, COLUMBIA, MD, 21046, UNITED STATES                                                                                 | United States of America |
| Amini, Payam      | Advarra, 6940 Columbia Gateway Drive, COLUMBIA, MD, 21046, UNITED STATES                                                                                 | United States of America |
| Antoszyk, Andrew  | Advarra, 6940 Columbia Gateway Drive, COLUMBIA, MD, 21046, UNITED STATES                                                                                 | United States of America |
| Maberley, David   | UBC Clinical Research Ethics Board, #210-828 West 10th Ave., V5Z 1L8, Vancouver, British Columbia, CANADA                                                | Canada                   |

|                           |                                                                                                                                                                |                          |
|---------------------------|----------------------------------------------------------------------------------------------------------------------------------------------------------------|--------------------------|
| Khanani, Arshad           | Advarra, 6940 Columbia Gateway Drive, COLUMBIA, MD, 21046, UNITED STATES                                                                                       | United States of America |
| Cagini, Carlo             | CER UMBRIA, Via Mario Angeloni, 61, Palazzo Broletto - 3 ° piano, 06124, Perugia, Umbria, ITALY                                                                | Italy                    |
| Viola, Francesco          | Comitato Etico Milano Area 2, Via Francesco Sforza, 28, 20122, MILANO, Lombardia, ITALY                                                                        | Italy                    |
| Lalonde, Laurent          | Advarra Inc., 300-372 Hollandview Trail, L4G 0A5, AURORA, Ontario, CANADA                                                                                      | Canada                   |
| Parravano, Maria Cristina | CE Dell'IRCCS Istituti Fisioterapici Ospitalieri Di Roma, VIA ELIO CHIANESI 53, 00144, ROMA, Lazio, ITALY                                                      | Italy                    |
| Patel, Apurva             | Advarra, 6940 Columbia Gateway Drive, COLUMBIA, MD, 21046, UNITED STATES                                                                                       | United States of America |
| London, Nikolas           | Advarra, 6940 Columbia Gateway Drive, COLUMBIA, MD, 21046, UNITED STATES                                                                                       | United States of America |
| Awh, Carl C.              | Advarra, 6940 Columbia Gateway Drive, COLUMBIA, MD, 21046, UNITED STATES                                                                                       | United States of America |
| Baumal, Caroline          | IRB Tufts Medical Center; Tufts Univ Health Sciences, 800 Washington St., Box 450, boston, MA, 02111, UNITED STATES                                            | United States of America |
| Reilly, Gayatri           | Advarra, 6940 Columbia Gateway Drive, COLUMBIA, MD, 21046, UNITED STATES                                                                                       | United States of America |
| Bridges, Jr., William Z   | Advarra, 6940 Columbia Gateway Drive, COLUMBIA, MD, 21046, UNITED STATES                                                                                       | United States of America |
| Lindsell, Lucas           | Advarra, 6940 Columbia Gateway Drive, COLUMBIA, MD, 21046, UNITED STATES                                                                                       | United States of America |
| Brown, David M.           | Advarra, 6940 Columbia Gateway Drive, COLUMBIA, MD, 21046, UNITED STATES                                                                                       | United States of America |
| Stoller, Glenn            | Advarra, 6940 Columbia Gateway Drive, COLUMBIA, MD, 21046, UNITED STATES                                                                                       | United States of America |
| Yiu, Glenn                | UC Davis IRB, 2921 Stockton Blvd., Suite 1429, Sacramento, CA, 95817, UNITED STATES                                                                            | United States of America |
| Sikorski, Bartosz         | Komisja Bioetyczna przy Slaskiej Izbie Lekarskiej w Katowicach                                                                                                 | Poland                   |
| Vajas, Attila             | Egeszsegugyi Tudomanyos Tanacs                                                                                                                                 | Hungary                  |
| Banerjee, Sanjiv          | Trent Multi-centre Research Ethics Committee                                                                                                                   | United Kingdom           |
| Narendran, Niro           | Trent Multi-centre Research Ethics Committee                                                                                                                   | United Kingdom           |
| Budzinskaya, Maria        | FSBI "Scientific Research Institute of Eye Diseases" of russia Academy of medical Sciences                                                                     | Russia                   |
| Kulikov, Alexey           | EC of FSB Military educational institution of HPE "Military Medical Academy n.a. S. M, Academic Lebedeva str., 6, 194044, Saint-Petersburg, RUSSIAN FEDERATION | Russia                   |
| Ito, Yasuo                | Review Board of Human Rights and Ethics for Clinical Studies Institutional Review Board, 13-2 Ichibancho, Chiyoda-ku, 102-0082, Tokyo, JAPAN                   | Japan                    |
| Ito, Yasuki               | Nagoya university Hospital IRB, 65 tsurumai-cho, showa-ku, nagoya-shi, 466-8560, Aichi, JAPAN                                                                  | Japan                    |
| Iida, Tomohiro            | Tokyo Women's Medical University Hospital IRB                                                                                                                  | Japan                    |
| Okada, Annabelle          | Kyorin University Hospital Institutional Review Board, 6-20-2 Shinkawa, Mitaka, 181-8611, Tokyo, JAPAN                                                         | Japan                    |
| Hayashi, Ken              | Hayashi Eye Hospital Institutional Review Board, 4-23-35 Hakata-eki mae, Hakata-ku, 812-0011, Fukuoka, JAPAN                                                   | Japan                    |

|                             |                                                                                                                                        |                          |
|-----------------------------|----------------------------------------------------------------------------------------------------------------------------------------|--------------------------|
| Mitamura, Yoshinori         | Tokushima University Hospital Institutional Review Board, 2-50-1 Kuramoto-cho, Tokushima-shi, 770-8503, Tokushima, JAPAN               | Japan                    |
| Gomi, Fumi                  | Hyogo College of Medicine Institutional Review Board                                                                                   | Japan                    |
| Kobayashi, Namie            | Southern TOHOKU General Hospital Institutional Review Board, 7-161 Yatsuyamada, Koriyama-shi, 963-8052, Fukushima, JAPAN               | Japan                    |
| Ono, Shinji                 | Asahikawa Medical University Hospital Institutional Review Board, 1-1-1 Midorigaokahigashi2jo,Asahikawa-shi, 078-8510, Hokkaido, JAPAN | Japan                    |
| Wong, King                  | Stichting Beoordeling Ethiek Biomedisch Onderzoek (BEBO), Dr. Nassaulaan 10, 9401 HK, Assen, NETHERLANDS                               | Netherlands              |
| van Lith-Verhoeven, Janneke | Stichting Beoordeling Ethiek Biomedisch Onderzoek (BEBO), Dr. Nassaulaan 10, 9401 HK, Assen, NETHERLANDS                               | Netherlands              |
| Tuli, Raman                 | Advarra Inc., 300-372 Hollandview Trail, L4G 0A5, AURORA, Ontario, CANADA                                                              | Canada                   |
| Kawasaki, Tsutomu           | Sugiura Clinic Institutional Review Board, 39 Nishitojinmachi Chuo-ku Kumamoto-shi, 860-0027, Kumamoto, JAPAN                          | Japan                    |
| Mori, Ryusaburo             | Nihon University Hospital's Joint Institutional Review Board, 30-1 Oyaguchikamicho itabashi-ku, 173-8610, Tokyo, JAPAN                 | Japan                    |
| Maeno, Takatoshi            | Toho University Sakura Medical Center Institutional Review Board, 564-1 Shimoshizu, Sakura-shi, 285-0841, Chiba, JAPAN                 | Japan                    |
| Oh, Hideyasu                | Hyogo Prefectural Amagasaki General Medical Center (Hyogo AGMC) IRB, 2-17-77 Higashinaniwa-cho, amagasaki-shi, 660-8550, Hyogo, JAPAN  | Japan                    |
| Yasuda, Kanako              | Tokyo Medical University Hachioji Medical Center Institutional Review Board, 1163 Tatemachi, Hachioji-shi, 193-0998, Tokyo, JAPAN      | Japan                    |
| Yoneda, Ai                  | Japanese Red Cross Nagasaki Genbaku Hospital Institutional Review Board, 3-15 Morimachi, Nagasaki-shi, 852-8511, Nagasaki, JAPAN       | Japan                    |
| Kimura, Kazuhiro            | Yamaguchi University Hospital Institutional Review Board, 1-1-1 Minami Kogushi Ube-Shi, 755-8505, Yamaguchi, JAPAN                     | Japan                    |
| Sekiryu, Tetsuju            | All Tohoku Clinical Trial Review and Audit Organization, 1-6-10 kamisugi, aobaku, sendai-shi, 980-0011, Miyagi, JAPAN                  | Japan                    |
| Sakamoto, Taiji             | Kagoshima University Hospital Institutional Review Board, 8-35-1 Sakuragaoka, Kagoshima-shi, 890-8520, Kagoshima, JAPAN                | Japan                    |
| Giunta, Michel              | Advarra Inc., 300-372 Hollandview Trail, L4G 0A5, AURORA, Ontario, CANADA                                                              | Canada                   |
| Honda, Shigeru              | Osaka City University Hospital IRB, 1-5-7,Asahimachi, Abeno-ku, Osaka-shi, 545-8586, Osaka, JAPAN                                      | Japan                    |
| Abraham, Prema              | Advarra, 6940 Columbia Gateway Drive, COLUMBIA, MD, 21046, UNITED STATES                                                               | United States of America |
| Takahashi, Kanji            | Kansai Medical University Hospital Institutional Review Board, 2-3-1 Shinmachi, Hirakata-shi, 573-1191, Osaka, JAPAN                   | Japan                    |
| Margherio, Alan             | Advarra, 6940 Columbia Gateway Drive, COLUMBIA, MD, 21046, UNITED STATES                                                               | United States of America |

|                         |                                                                                                                                                          |                          |
|-------------------------|----------------------------------------------------------------------------------------------------------------------------------------------------------|--------------------------|
| Mehta, Sonia            | Wills Eye Hospital IRB, 840 Walnut St., 15th Floor, Philadelphia, PA, 19107, UNITED STATES                                                               | United States of America |
| Takayama, Kei           | National Defense Medical College Hospital Institutional Review Board, 3-2 Namiki, Tokorozawa-shi, 359-8513, Saitama, JAPAN                               | Japan                    |
| Matsubara, Hisashi      | Mie University Hospital Institutional Review Board                                                                                                       | Japan                    |
| Garcia-Layana, Alfredo  | CEIC HU Puerta de Hierro de majadahonda, Planta 1 <sup>a</sup> - Pasillo Unidades Administrativas (peines 6-7), 28222, Majadahonda Madrid, MADRID, SPAIN | Spain                    |
| Ruiz Moreno, Jose Maria | CEIC HU Puerta de Hierro de majadahonda, Planta 1 <sup>a</sup> - Pasillo Unidades Administrativas (peines 6-7), 28222, Majadahonda Madrid, MADRID, SPAIN | Spain                    |
| Escobar, Joan Josep     | CEIC HU Puerta de Hierro de majadahonda, Planta 1 <sup>a</sup> - Pasillo Unidades Administrativas (peines 6-7), 28222, Majadahonda Madrid, MADRID, SPAIN | Spain                    |
| Gomez Ulla, Francisco   | CEIC HU Puerta de Hierro de majadahonda, Planta 1 <sup>a</sup> - Pasillo Unidades Administrativas (peines 6-7), 28222, Majadahonda Madrid, MADRID, SPAIN | Spain                    |
| Dolz, Rosa              | CEIC HU Puerta de Hierro de majadahonda, Planta 1 <sup>a</sup> - Pasillo Unidades Administrativas (peines 6-7), 28222, Majadahonda Madrid, MADRID, SPAIN | Spain                    |
| Figuerola, Marta        | CEIC HU Puerta de Hierro de majadahonda, Planta 1 <sup>a</sup> - Pasillo Unidades Administrativas (peines 6-7), 28222, Majadahonda Madrid, MADRID, SPAIN | Spain                    |
| Sararols, Laura         | CEIC HU Puerta de Hierro de majadahonda, Planta 1 <sup>a</sup> - Pasillo Unidades Administrativas (peines 6-7), 28222, Majadahonda Madrid, MADRID, SPAIN | Spain                    |
| Murata, Toshinori       | Shinshu University Hospital Institutional Review Board, 3-1-1 Asahi, Matsumoto-shi, 390-8621, Nagano, JAPAN                                              | Japan                    |
| Abdulaeva, Elmira       | LEC of Ltd."Kuzlyar", Chistopolskaya str., 16/15, 420066, KAZAN, TATARSTAN, RUSSIAN FEDERATION                                                           | Russia                   |
| Nishimura, Tetsuya      | Kansai Medical University Hospital Institutional Review Board                                                                                            | Japan                    |
| Noda, Kousuke           | Hokkaido University Hospital Institutional Review Board, Kita14-jo,Nishi5-chome,Kita-ku,Sapporo, 060-8648, Hokkaido, JAPAN                               | Japan                    |
| Koizumi, Hideki         | University of the Ryukyus Hospital Institutional Review Board                                                                                            | Japan                    |
| Yamashita, Ayana        | Kagawa University Hospital Institutional Review Board, 1750-1, Ikenobe, Miki-cho, Kita-gun, 761-0793, Kagawa, JAPAN                                      | Japan                    |
| Garcia-Layana, Alfredo  | CEIC HU Puerta de Hierro de majadahonda, Planta 1 <sup>a</sup> - Pasillo Unidades Administrativas (peines 6-7), 28222, Majadahonda Madrid, MADRID, SPAIN | Spain                    |
| Kaga, Tatsushi          | Japan Community Health care Organization Chukyo Hospital, 1-1-10, Sanjo Minami-ku, Nagoya-shi, 457-8510, Aichi, JAPAN                                    | Japan                    |
| Imaizumi, Hiroko        | Sapporo City General Hospital Institutional Review Board, 3-32-8 Shinjuku, Shinjuku-ku, 060-8604, Hokkaido, JAPAN                                        | Japan                    |
| Yoreh, Barak            | Helsinki Committee - Rambam                                                                                                                              | Israel                   |
| Rosenblatt, Irit        | Helsinki Committee - Rabin Beilinson M.C                                                                                                                 | Israel                   |
| Mukherjee, Raj          | Trent Multi-centre Research Ethics Committee                                                                                                             | United Kingdom           |
| Gawecki, Maciej         | Komisja Bioetyczna przy Slaskiej Izbie Lekarskiej w Katowicach                                                                                           | Poland                   |

EC = ethics committee; IRB = institutional review board.
